1 **Genetic architecture of trophic adaptations in cichlid fishes**

2

3

4

5 Leah DeLorenzo<sup>1</sup>, Victoria DeBrock<sup>1</sup>, Aldo Carmona Baez<sup>2</sup>, Patrick J. Ciccotto<sup>2,3</sup>, Erin N.  
6 Peterson<sup>2</sup>, Clare Stull<sup>2</sup>, Natalie B. Roberts<sup>2</sup>, Reade B. Roberts<sup>2</sup>, and Kara E. Powder<sup>1\*</sup>

7

8 <sup>1</sup> Department of Biological Sciences, Clemson University, Clemson, SC 29634, USA.

9 <sup>2</sup> Department of Biological Sciences, and Genetics and Genomics Academy, North  
10 Carolina State University, Raleigh, NC 27695, USA.

11 <sup>3</sup> Department of Biology, Warren Wilson College, Swannanoa, NC 28778, USA.

12

13

14 *\*Corresponding Author:*

15 Department of Biological Sciences

16 Clemson University

17 055A Life Science Facility

18 190 Collings Street

19 Clemson, SC 29634

20 Tel: 864-656-3196

21 Email: [kpowder@clemson.edu](mailto:kpowder@clemson.edu)

22

23 **RUNNING TITLE**

24 Genetics of feeding adaptation

25

26 **KEYWORDS:** craniofacial, adaptation, quantitative trait loci, cichlid

27

28 **ABSTRACT**

29 Since Darwin, biologists have sought to understand the evolution and origins of  
30 phenotypic adaptations. The skull is particularly diverse due to intense natural selection  
31 such as feeding biomechanics. We investigate the genetic and molecular origins of  
32 trophic adaptation using Lake Malawi cichlids, which have undergone an exemplary  
33 evolutionary radiation. We analyze morphological differences in the lateral and ventral  
34 head among an insectivore that eats by suction feeding, an obligate biting herbivore,  
35 and their F<sub>2</sub> hybrids. We identify variation in a series of morphologies including  
36 mandible width, mandible length, and buccal length that directly affect feeding  
37 kinematics and function. Using quantitative trait loci (QTL) mapping, we find that many  
38 genes of small effects influence these craniofacial adaptations. Intervals for some traits  
39 are enriched in genes related to potassium transport and sensory systems, the latter  
40 suggesting correlation between feeding structures and sensory adaptations for foraging.  
41 Craniofacial phenotypes largely map to distinct genetic intervals, and morphologies in  
42 the head do not correlate. Together, these suggest that craniofacial traits are mostly  
43 inherited as separate modules, which confers a high potential for the evolution of  
44 morphological diversity. Though these traits are not restricted by genetic pleiotropy,  
45 functional demands of feeding and sensory structures likely introduce constraints on  
46 variation. In all, we provide insights into the quantitative genetic basis of trophic  
47 adaptation, identify mechanisms that influence the direction of morphological evolution,  
48 and provide molecular inroads to craniofacial variation.

49

50 **INTRODUCTION**

51 Understanding the patterns and origins of variation is a key challenge within both  
52 developmental biology and evolutionary biology. A structure with significant  
53 morphological diversity is the skull, with variation across and within many clades of  
54 vertebrates including fishes [1-3], birds [4-6], reptiles [7, 8], and mammals [9-13]. A  
55 critical selective pressure faced by craniofacial structures is trophic niche specialization,  
56 with skull morphology directly feeding into biomechanical performance and fitness [14].  
57 These forces shape a complex geometry of the skull, with morphological variation  
58 deriving from the cumulative effects of genetics, developmental processes,  
59 environmental effects, and functional interactions [15-20].

60

61 An iconic system for morphological variation is cichlid fishes, which have undergone  
62 one of the most rapid diversifications in vertebrates [21, 22]. A hallmark of their adaptive  
63 radiation is the diversity of craniofacial structures, which are intimately connected to  
64 their feeding niche and ecology [2, 23, 24]. Cichlids, like other teleost fishes, have  
65 evolved multiple disparate feeding strategies including suction feeding, biting, and ram  
66 feeding, each of which is associated with a suite of phenotypic adaptations [24]. Despite  
67 this range of craniofacial morphologies in cichlids, a major ecomorphological axis of  
68 variation in cichlids distinguishes two of these strategies, suction feeding and biting [2,  
69 25]. On one end of this axis are suction feeders. These animals eat from the water  
70 column by generating a high rate of flow into the mouth that overcome any flow in the  
71 opposite direction or attempts by mobile prey to swim away [26-29]. Morphologically,  
72 this is accomplished through a large buccal cavity and restricted mouth size that confer  
73 an ability to generate pressure differentials in the oral cavity [26, 27]. Production of the

74 pressure differential is enhanced through a relatively long mandible that allows quick  
75 movements of the jaw [28, 30-33]. Further, large eyes in suction feeders may increase  
76 vision to provide an advantage in hunting prey [34], but may also constrain the size of  
77 jaw muscles needed for mandible movement [35]. On the alternate end of this  
78 morphological spectrum are fishes that feed by scraping/biting attached algae or  
79 crushing shelled invertebrates. These fish trade off speed in mandible movements for  
80 power with jaw closing, primarily conferred by a shorter lower jaw [28, 30-32].

81  
82 Cichlids from independent radiations have undergone similar divergences in craniofacial  
83 morphology between fish that suction feed versus bite [25, 36, 37], and this trend  
84 extends more broadly across fishes as well [38-40]. This pattern suggests that genetic,  
85 developmental, or functional constraints are limiting or biasing the direction of  
86 morphological evolution in the skull [41-43]. For example, coordinated changes could be  
87 driven by “supergene” regions [44-46] or biomechanical demands of ecological niches  
88 may cause convergent evolution of form (e.g. [47]). A full understanding of the patterns  
89 of morphological variation, as well as the number and effects of genes that underlie  
90 these shapes, is necessary to clarify which aspects of head anatomy demonstrate  
91 covariation, have increased evolutionary flexibility, or are simpler versus more complex  
92 phenotypes.

93  
94 Here, we use two species of cichlids to investigate the adaptation of craniofacial  
95 morphology and the genetic basis of this variation. Both *Labidochromis caeruleus* and  
96 *Labeotropheus trewavasae* live in rocky habitats of Lake Malawi, but feed by suction

97 feeding and scraping, respectively [23]. Fishes of the *Labidochromis* genus are typically  
98 insectivores that suction feed or pluck their prey from the water column [23].  
99 Alternatively, fishes of the *Labeotropheus* genus strictly feed by biting algae that is  
100 attached to rocky substrates [23]. We first quantify a series of morphological  
101 adaptations in the lateral and ventral craniofacial skeleton in these species. We then  
102 utilize quantitative trait loci (QTL) mapping in a population of *Labidochromis* x  
103 *Labeotropheus* F<sub>2</sub> hybrids to ask if these traits are controlled by the same genetic  
104 intervals or distinct loci, and thus inherited as a module or independently, respectively.  
105 Finally, we examine candidate genes and pathways enriched by gene ontology (GO)  
106 term analysis to uncover molecular mechanisms that may influence craniofacial  
107 morphological diversity. Overall, these data will elucidate genetic factors that influence  
108 diversity in trophic adaptations of the craniofacial skeleton and drive major  
109 morphological variation in the skull.

110

## 111 **MATERIALS AND METHODS**

### 112 *Fishes and pedigree*

113 All work was completed under animal protocol 140-101-O approved by the Institutional  
114 Animal Care and Use Committee (IACUC) at North Carolina State University. A single  
115 *Labidochromis caeruleus* female was crossed with a single *Labeotropheus trewavasae*  
116 male to create one F<sub>1</sub> family, that was subsequently incrossed to produce a hybrid F<sub>2</sub>  
117 population of 447 fishes. Hereafter, *Labidochromis caeruleus* and *Labeotropheus*  
118 *trewavasae* will be referred to as their genus name. Fish were reared in aquaria under  
119 standard feeding with flake food for five months, at which time they were euthanized

120 with buffered MS-222 for morphological analysis. Lateral and ventral images of each  
121 specimen were taken using an Olympus digital camera under standardized lighting  
122 conditions in a lightbox. A color standard and scale were included in each picture.

123

#### 124 Linear measures of head shape variation

125 Measures were taken on 10 parental specimens per species of *Labidochromis* and  
126 *Labeotropheus*, and either 447 F<sub>2</sub> hybrids for lateral analysis or 319 F<sub>2</sub> hybrids for  
127 ventral analysis. From photographs of the lateral body, we measured standard length  
128 (snout to caudal peduncle), head length (snout to opercle), head depth (anterior  
129 insertion of the dorsal fin to the insertion of the pelvic fin), length from the snout to the  
130 insertion of the pelvic fin, preorbital length (snout to anterior edge of the eye), eye  
131 diameter, and mouth angle (Figure 1b). Eye area was calculated from eye diameter  
132 measurements. Measures of the ventral anatomy included mandible width, mandible  
133 length, width from the posterior of the opercle to midline, length from the posterior of the  
134 opercle to the joint of the mandible and palatoquadrate, and mandible angle (Figure 1d).  
135 Measurements were taken using ImageJ software as number of pixels and were then  
136 converted into centimeters using the scale in each photo. To remove the effects of  
137 allometry, all measures were converted to residuals by normalizing to standard length  
138 using a data set with both parental species and their hybrids. Further analysis was  
139 conducted in R, including ANOVAs, Tukey's Honest Significant Difference post-hoc  
140 tests, and correlations.

141

#### 142 Geometric morphometric shape analysis

143 Geometric morphometric shape analysis was used to further quantify head shape  
144 variation. A series of homologous landmarks were chosen highlighting lateral and  
145 ventral craniofacial anatomy important to feeding mechanics (Figure 1a, Figure 1c). In  
146 both cases, we only analyzed one side of the specimen, avoiding the side in which there  
147 were body dissections posterior to the pectoral fins. X,Y coordinates of all landmarks  
148 were collected and extracted from photos using the tpsDig2 software package [48].  
149 These data were uploaded into the R package geomorph, in which Procrustes  
150 superimposition was used to remove variation due to size, rotation, and position of  
151 landmarks to leave variation only due to shape. As with the linear data, the effects of  
152 allometry were removed through size correction and regression of shape on standard  
153 length. All geometric morphometric analyses were conducted on a data set including  
154 both parental species and their hybrids.

155

#### 156 Genotyping with ddRAD-sequencing

157 Genomic DNA was extracted from caudal fin tissue using DNeasy Blood and Tissue kits  
158 (Qiagen). RADseq libraries were prepared as previously described [49], including  
159 double digestion and indexing, then sequenced on Illumina HiSeq with 100bp paired end  
160 reads (North Carolina State University Genomic Sciences Laboratory core facility). The  
161 program process\_radtags (Stacks, version 2), was used to process raw sequencing  
162 data including demultiplexing, truncating reads to 150bp, and filtering of low-quality  
163 reads. Processed reads were aligned to the *Maylandia zebra* UMD2a reference genome  
164 using BWA with the mem algorithm. The programs pstacks, cstacks, and sstacks  
165 (Stacks, version 1) were used to identify and catalogue RAD markers in the parental

166 and F<sub>2</sub> hybrid samples. Finally, markers with alternative alleles in the parental species  
167 were called as AA or BB genotypes using the program genotypes (Stacks, version 1),  
168 requiring a minimum stack depth of 3 to export a marker in a specific individual. The A  
169 allele was inherited from the *Labidochromis* granddam and the B allele from the  
170 *Labeotropheus* grandsire.

171

### 172 Generation of the linkage map

173 The genetic map was generated using the package R/qtl [50] and in-house R scripts.  
174 Markers were first sorted into linkage groups according to their position in the *M. zebra*  
175 UMD2a reference genome. Markers were removed from the data set if they were  
176 located on unplaced scaffolds with more than 40% of missing data, or in linkage groups  
177 with more than 20% missing data. A chi-square test was performed on the remaining  
178 markers using the geno.table function. Those markers with a distorted segregation  
179 pattern and a Bonferroni-corrected p-value < 0.01 were discarded from the dataset. The  
180 initial map was generated based on estimated pairwise recombination frequencies using  
181 est.map and est.rf functions. Markers in linkage groups that were not initially flagged as  
182 misplaced were removed if they increased the size of the map by at least 6  
183 centimorgans (cM) and flanking markers were < 3Mb apart. Markers that were in  
184 unplaced scaffolds were integrated into a linkage group if they had a recombination  
185 frequency < 0.15 with at least 5 markers from that linkage group. Any other markers that  
186 were in unplaced scaffolds that did not meet the above criteria were removed. If  
187 markers had irregular relationships between their recombination frequency and position  
188 in the genetic map, they were rearranged manually to minimize crossover events; these



189 are likely due to being located in structural variants or misassembled sections of the  
190 reference genome. Genotyping errors were identified using the function `calc.errorlod`  
191 and set as missing data if they had a LOD score  $\geq 3$ . The linkage map was refined with  
192 a non-overlapping window algorithm that selected one marker in a 2cM window with the  
193 least amount of missing data. Finally, the function `est.map` was used to estimate the  
194 final map and the maximum likelihood estimate of the genotyping error rate (0.0001).  
195 The final map was 1239.5 cM in total size, with 22 linkage groups, 1180 total markers  
196 and 42-81 markers per each linkage group.

197

#### 198 Quantitative trait loci (QTL) mapping

199 We conducted multiple-QTL mapping (MQM) using the R/qtl package [50-52] following  
200 [53]. Scripts are described and available in [54]. First, an initial scan for QTL was done  
201 using the `onescan` function in R/qtl [50]. Putative QTL with a LOD approaching or above  
202 2.5 were used to build a more robust statistical model. The MQM method uses these  
203 putative QTL as cofactors in follow-up scans and verifies each cofactor by backward  
204 elimination. The use of cofactors in the final model aids in the accurate detection of QTL  
205 and assessment of their effects [53]. The statistical significance of each QTL was  
206 determined using 1000 permutations on the final model. For QTL peaks meeting 5%  
207 (significance) or 10% (suggestive) level, 95% confidence intervals were calculated using  
208 Bayes analysis. Details of QTL mapping including cofactors used in the model,  
209 significance levels, confidence intervals, and allelic effects are in Table S3.

210

#### 211 Candidate gene annotation and enrichment analysis

212 The markers are named based on contig and nucleotide positions in the *M. zebra*  
213 reference genome, M\_zebra\_UMD2a assembly. Gene symbols, ID, and chromosomal  
214 positions for candidate genes in each QTL interval were retrieved from the NCBI  
215 genome data viewer (<https://www.ncbi.nlm.nih.gov/genome/gdv>) gene track for *M. zebra*  
216 annotation release 104. If the upper and lower limits of a QTL interval were mapped to  
217 unplaced scaffolds, the closest marker that mapped to a placed scaffold was used to  
218 determine candidate gene information. Gene names for each candidate were retrieved  
219 using the NCBI gene ID and the Database for Visualization and Integrated Discovery  
220 (DAVID) [55].

221

222 Gene ontology (GO) term enrichment analysis was performed with the functional  
223 annotation tool in the Database for Visualization and Integrated Discovery (DAVID) [55,  
224 56]. NCBI gene ID (entrez gene ID) for candidate genes in QTL intervals were used as  
225 a query. Analysis was run for each individual trait, pooling multiple QTL as applicable,  
226 as well as bulk analysis of all lateral QTL and all ventral QTL. A p-value of 0.05 with a  
227 Fishers exact probability test was used to denote significance for terms in GO analysis.

228

## 229 **RESULTS AND DISCUSSION**

### 230 *Lateral head shape variation*

231 Lateral skull shape is distinct between parental species *Labidochromis* and  
232 *Labeotropheus* for all linear measures (Figure 2a-f and Table S1). Their F<sub>2</sub> hybrids are  
233 largely intermediate in phenotype, though in some cases such as length of the preorbital  
234 region (Figure 2d) surpass the range of the parental species. *Labidochromis* fish have

235 an overall longer and deeper head than *Labeotropheus* given a similar body size.  
236 Specifically, *Labidochromis* compared to *Labeotropheus* parentals have an increased  
237 proportion of the body that is the head ( $p < 1e-7$ , Figure 2a), a longer distance between  
238 the dorsal fin and pelvic fin ( $p < 1e-7$ , Figure 2b), and larger eye ( $p < 1e-7$ , Figure 2e).  
239 Further, the mouth of *Labidochromis* fish is angled towards the front, rather than  
240 towards the ventral side of the body as in *Labeotropheus* ( $p < 1e-7$ , Figure 2f). Finally,  
241 *Labidochromis* showed an increased length between the snout and pelvic fin ( $p = 2.2e-6$ ,  
242 Figure 2c). Coupled with a more modest, though still significant, enlargement of the  
243 preorbital region ( $p = 0.018$ , Figure 2d), this suggests that the opercular region of these  
244 fishes is also distinct.

245  
246 Geometric morphometrics provided more detailed insights into shape differences,  
247 including within the opercular region of the head. The first five principal components  
248 (PCs) described (75.2% total shape variation [TSV]) in lateral shape in *Labidochromis*  
249 sp., *Labeotropheus* sp., and their F2 hybrids (Figure 3a, Figure 3c, and Figure S1). PC1  
250 lateral (22.4% TSV) differentiated the two parental species ( $p < 1e-7$ ), with  
251 *Labidochromis* species associated with a positive PC1 lateral score that describes a  
252 longer head with a more posterior eye placement (Figure 3a and Figure S1b). Based on  
253 linear measures, this shift in eye position is due to both a larger preorbital region (Figure  
254 2d) and a larger eye area (Figure 2e). As suggested by linear measures, PC1 lateral  
255 shape differences show that *Labidochromis* has a larger opercular region, while the  
256 operculum in *Labeotropheus* only extends about halfway between the eye and insertion  
257 of the pelvic fin (Figure 3c). PC2 lateral, PC3 lateral, and PC4 lateral were not

258 significantly different between the parentals ( $p=0.071$ ,  $p=0.99$ , and  $p=0.77$ , respectively,  
259 Table S1) and thus represent shape variation largely present in the  $F_2$  hybrids. PC2  
260 lateral (17.2% TSV) predominantly described the relative length of the head, with a  
261 negative PC2 lateral score characterizing head anatomy that has a longer profile from  
262 snout to dorsal fin and a pelvic fin that is inserted closer to the opercle (Figure S1c).  
263 PC3 lateral (13.3% TSV) depicted coordinated changes in both head length and depth,  
264 with a negative score representing a deep, short head with a steep craniofacial profile  
265 and reduced opercular region (Figure S1d). Notably, a steep craniofacial profile in  
266 cichlids has been associated with an ability for the skull to withstand increased biting  
267 forces [57]. PC4 lateral (11.4% TSV) describes differences in the dorsal-ventral depth of  
268 the opercular region, as well as the dorsal-ventral positioning of the eye (Figure S1e).  
269 Finally, PC5 lateral (11.0% TSV) distinguishes the two parental species ( $p=0.012$ ).  
270 *Labidochromis* parentals are associated with a more negative PC5 lateral score and a  
271 reduced opercle bone (Figure S1f).

272

### 273 Ventral head shape variation

274 Compared to *Labeotropheus*, *Labidochromis* parental fish have a decreased mandible  
275 width ( $p<1e-7$ , Figure 2g), increased mandible length ( $p=4e-7$ , Figure 2h), and longer  
276 length of the opercular region ( $p<1e-7$ , Figure 2j). Mandible angle assesses the relative  
277 proportions of the lower jaw, with an increased measure indicating increased width,  
278 decreased length, or both, in the case of *Labeotropheus* ( $p<1e-7$  compared to  
279 *Labidochromis*, Figure 2k). These shape changes combine with a similar width at the  
280 opercle ( $p=0.93$ , Figure 2i), the only measure that was not distinct between parentals.

281 This results in a more triangular ventral shape for *Labidochromis* and a more  
282 rectangular shape for *Labeotropheus* parentals (Figure 3d).  
283  
284 Relative mandible length and width also dominated geometric morphometric analysis of  
285 the ventral skeleton. The first three ventral principal components cumulatively describe  
286 76.2% TSV in ventral craniofacial anatomy. PC1 describes 43.6% TSV, with the  
287 parental species defining the extremes ( $p < 1e-7$ , Figure 3b). *Labidochromis* parents are  
288 associated with a positive PC1 ventral score and a narrower, arched mandible versus  
289 the wide and flat mandible shape of *Labeotropheus* (Figure 3b, Figure 3d, and Figure  
290 S1g). PC2 ventral (18.7% TSV) is also distinct between parentals ( $p = 8.2e-5$ , Figure 3b),  
291 with a narrow mandible, increased distance of the opercular region, and pectoral fin  
292 musculature shifted to the anterior (Figure S1h). PC3 ventral (13.9% TSV) describes  
293 relative mandible length without an accompanying change in the width (Figure S1i) and  
294 is not significantly different between *Labidochromis* and *Labeotropheus* parentals  
295 ( $p = 0.31$ ).  
296  
297 Combining both lateral and ventral shape variation demonstrates the multiple ways  
298 *Labidochromis* and *Labeotropheus* have craniofacial biomechanics that are adapted to  
299 their feeding niches. *Labidochromis* sp. pluck or suction feed insects within Lake Malawi  
300 [23]. Their longer mandibles (Figure 2h) allow more velocity transmission during jaw  
301 movement [32], critical for capture of mobile prey. This is combined with a narrow  
302 mandible (Figure 2g) that opens into a longer and wider opercular and buccal region  
303 (Figure 2i-j), forming a triangular ventral shape (Figure 3d). The large expansion

304 possible in the buccal cavity of *Labidochromis* causes high velocity and acceleration of  
305 water flowing into the mouth, containing the invertebrate prey; this water flow is  
306 increased by a narrow mouth opening (Figure 2g, Figure 3d) [26, 58, 59]. On the other  
307 hand, *Labeotropheus* sp. are herbivorous grazers that scrape or shear immobile algae  
308 from rocks or other substrate using their mandible [23]. The short mandible (Figure 2h)  
309 of *Labeotropheus* represents a tradeoff of speed of jaw movement for high transmission  
310 of force with jaw closing [32]. This is combined with a downturned mouth (Figure 2f) and  
311 a short, wide, and flat preorbital and mandibular region (Figure 2d, Figure 2g, Figure 3c,  
312 and Figure 3d). Together, these are thought to enhance foraging efficiency for  
313 *Labeotropheus* by providing a large oral area and structures that are used as a fulcrum  
314 to leverage attached algae from their substrate [23].

315

### 316 Genetic basis of body shape

317 Quantitative trait loci (QTL) mapping was used to assess the genetic architecture that  
318 underlie these adaptive morphologies. Mapping of all 19 traits (11 lateral and 8 ventral  
319 measures) including both linear (Figure 2) and geometric measures (Figure 3 and  
320 Figure S1) of shape identified 23 genetic intervals that contribute to phenotypic  
321 differences in head shape in *Labidochromis* x *Labeotropheus* hybrids (Figure 4, Figure  
322 S2, Figure S3, and Table S3). Between one and three QTL mapped to 12 of the 22  
323 linkage groups. These QTL explained 3.3-7.0% of the total variation for each trait  
324 (Figure S3 and Table S3), indicating that each of these traits is controlled by many  
325 genes of small effects. Even for the trait with the most QTL, PC2 lateral shape, the 5  
326 QTL combine to explain only 23.8% of the total coordinated variation (Figure S3) in

327 head length, craniofacial profile, and pelvic fin insertion (Figure S1c). The allelic effects  
328 within this QTL (Figure S3) further suggest a complex genetic architecture, with the  
329 allele inherited from the *Labidochromis* parent contributing to a higher PC2 lateral score  
330 for QTL on LG7 and LG10, the *Labeotropheus* allele associated with a higher value for  
331 the QTL on LG2, and heterozygous animals having the largest PC2 lateral score for the  
332 QTL on LG6 and LG23. Given that cichlid species continue to segregate and exchange  
333 a set of ancestral polymorphisms [60-64], this genetic variation is all likely to contribute  
334 to craniofacial divergence and feeding adaptation within the cichlid flock.

335

336 While QTL were distributed across linkage groups, seven linkage groups had  
337 overlapping QTL intervals (Figure 4 and Table S3). Four of these overlapping regions  
338 included a linear measure and a principal component from geometric morphometrics,  
339 where the principal component also includes variation in that linear measure. For  
340 instance, there are three overlapping QTL intervals on LG20 which describe relative  
341 head length, depth of the head from the dorsal fin to the pelvic fin, and PC3 lateral  
342 shape (Figure 4). PC3 lateral shape includes major variation in the anterior-posterior  
343 length and dorsal-ventral depth of the head (Figure S1d), explaining why these  
344 phenotypes map to a common genetic interval. Likewise, preorbital length varies in both  
345 PC2 lateral and PC3 lateral shape (Figures S1c and Figure S1d). QTL for the preorbital  
346 region overlap with QTL for PC2 lateral and PC3 lateral on LG7 and LG17, respectively  
347 (Figure 4 and Table S3). Finally, the length of the pelvic fin insertion point to the tip of  
348 the snout is part of PC4 lateral shape (Figure S1e), and QTL for these traits overlap on  
349 LG12 (Figure 4 and Table S3).

350  
351 Overlap of QTL may also lead to a coordinated change in shape. However, aside from  
352 effects of allometry (i.e. correlation with standard length, Table S2), no phenotypes  
353 showed morphological correlation ( $0.8 < r < -0.8$ ) with each other in the F2 hybrids.  
354 Correlations of phenotypes ranged from -0.65 to 0.78 with a mean of 0.027 (Table S2).  
355 This suggests that the morphological traits are largely inherited as modular units rather  
356 than as a set of coordinated phenotypes. Despite this, we noted linkage groups that  
357 have overlapping QTL for both lateral and ventral shape variation. LG6 contains a QTL  
358 cluster for PC2 lateral shape, opercle to mandible length, and opercle to midline ventral  
359 width (Figure 4 and Table S3). Genetic intervals associated with eye area overlap with  
360 opercle to midline width on LG15 and mandible angle on LG16-21 (Figure 4 and Table  
361 S3); for all these QTL, the allele inherited from *Labidochromis* increases each of these  
362 measurements (Figure S3, Table S3). This common genetic basis, and even sometimes  
363 common allelic effects, indicate that a single gene or linked genes in this interval may  
364 have pleiotropic effects on feeding adaptations. However, the fact that phenotypes were  
365 largely controlled by distinct QTL and showed minimal correlations (Table S2) means  
366 that distinct feeding morphologies could theoretically evolve independently and  
367 recombine into new patterns. This modular pattern would increase the morphological  
368 variability possible in cichlids (i.e. be more evolvable) [65-69]. Despite this, three  
369 independent, large-scale radiations of cichlids in the African Rift-Lakes have generated  
370 animals with similar trophic specializations that share remarkable similarities in their  
371 craniofacial morphologies [25, 36, 37]. Thus, despite largely being independent in terms  
372 of genetic structure, morphological disparity is constrained. Our data suggests this is



373 predominantly due to functional demands of feeding and strong natural selection on  
374 feeding performance, rather than a genetic constraint [70-72].

375

376 Gene Ontology (GO) analysis

377 More work is needed to narrow down and determine the specific effects of candidate  
378 genes within QTL intervals (Table S4), but GO analysis was used as a start to  
379 identifying trends and pathways that are enriched. Members of the Wnt signaling  
380 pathway were significantly enriched ( $p=0.046$ , Table S5) for mouth angle, though we  
381 note this is only a single QTL on LG13. There is a strong relationship between the  
382 mouth angle and the steepness of the craniofacial profile (see solid line in Figure 1a),  
383 with a shallow profile leading to a narrow mouth angle and jaw facing forward.  
384 Alternatively, a steep profile is associated with *Labeotropheus* sp. [73], an increased  
385 mouth angle (Figure 2f) and ventrally angled jaws. Wnt signaling plays a pivotal role in  
386 shape of the craniofacial profile, with increased Wnt signaling causing a retention of  
387 larval phenotypes and a steep facial profile in cichlids [73, 74]. Based on the function of  
388 Wnt signaling in craniofacial development across vertebrates, this is likely through  
389 alteration of cellular proliferation and outgrowth [4, 73, 75-77] and precocious bone  
390 deposition [73, 78, 79].

391

392 Four traits are statistically significant for changes in potassium transport: head  
393 proportion ( $p=0.018$ ), the distance between the dorsal and pelvic fins ( $p=0.018$ ), PC2  
394 lateral shape ( $p=0.031$ ), and PC4 lateral shape ( $p=0.024$ ) (Table S5). This common  
395 signal for head proportion and dorsal to pelvic fin length is likely driven by the fact that

396 these traits have an overlapping QTL on LG20. Further, both PC2 lateral (Figure S1c)  
397 and PC4 lateral (Figure S1e) include variation in both of these linear measures.  
398 Potassium could have numerous influences on craniofacial morphology as this mineral  
399 regulates cell proliferation [80], chondrogenesis [81], osteoclast [82] and osteoblast [81,  
400 83] differentiation, and bone mineralization [81, 83]. Potassium can also influence  
401 pathways critical for facial and bone development such as Bmp signaling [75, 81, 84],  
402 which is also associated with mandibular adaptation in cichlids [32]. Finally, mutation of  
403 potassium channels can lead to a series of developmental syndromes that include  
404 craniofacial morphologies that mimic evolved variation in cichlids. For example,  
405 Andersen-Tawil syndrome is characterized by a broad facial width and mandibular  
406 hypoplasia [85-87], while Birk-Barel syndrome results in a narrow forehead,  
407 micrognathia, and cleft or high-arched palate [86, 88] (see Figures 2g-i).  
408  
409 It is perhaps unsurprising that eye area was enriched for the GO terms olfaction and  
410 sensory transduction ( $p=1.25e-6$  and  $p=5.5e-5$ , respectively, Table S5), given the  
411 common developmental origin of sensory structures [89, 90]. However, both mandible  
412 angle and a combined analysis of all ventral skeletal morphologies were also enriched  
413 for genes associated with these terms ( $p=3.1e-4$  to  $p=2.26e-8$ , Table S5). This may be  
414 due to coordinated adaptations for feeding strategies as olfaction and sight are  
415 important for identifying mobile prey prior to suction feeding [34, 91, 92]. However, this  
416 may also be due to functional and spatial constraints, wherein a narrow face or large  
417 jaw musculature restricts the space available to develop large eyes [35].  
418

## 419 **CONCLUSIONS**

420 Craniofacial variation is prodigious across vertebrates, with direct impact on feeding  
421 strategy and fitness. Here, we identify the genetic basis for a series of adaptations related  
422 to suction feeding versus biting, including overall head proportions, mandible shape,  
423 ventral width, and dimensions of the buccal cavity. These phenotypes are not correlated  
424 and largely share independent genetic architecture. Our data thus suggests that  
425 craniofacial morphologies are likely constrained due to functional demands rather than  
426 similar genetics.

427

## 428 **SUPPLEMENTARY MATERIALS**

429 Supplementary data includes additional geometric morphometric details, QTL scans and  
430 details summarized in Figure 4, and tables with statistical analyses of phenotypes, QTL  
431 scan details, candidate genes in QTL intervals, and GO analysis.

432

## 433 **ACKNOWLEDGEMENTS AND FUNDING**

434 This work was supported by NSF CAREER IOS-1942178 (KEP), NIH P20GM121342  
435 (KEP), NIH R15DE029945 (KEP), NSF IOS-1456765 (RBR), and an Arnold and Mabel  
436 Beckman Institute Young Investigator Award (RBR).

437

## 438 **AUTHOR CONTRIBUTIONS**

439 KEP and RBR conceptualized the research. ACB, ECM, PJC, and NBR performed  
440 animal husbandry, photography, and collections. NBR prepared sequencing libraries.  
441 KEP, LD, and VD performed phenotypic measurements. KEP, LD, VD, ECM, ACB, and

442 RBR analyzed data. KEP and LD wrote the initial paper with edits and review from all  
443 authors. KEP and RBR administered the project and acquired funding.

444

#### 445 **DATA AVAILABILITY**

446 Data is accessible at Dryad [link to be provided prior to publication]. These files include  
447 phenotypic measures, TPS files for geometric morphometric analysis, and genotypes  
448 used for quantitative trait loci mapping.

449

#### 450 **CONFLICTS OF INTEREST**

451 The authors declare no conflicts of interest. Funding sponsors had no role in the design,  
452 execution, interpretation, or writing of the study.

453

#### 454 **REFERENCES**

- 455 1. Evans, K.M., et al., Why the short face? Developmental disintegration of the  
456 neurocranium drives convergent evolution in neotropical electric fishes. *Ecol Evol*,  
457 2017. **7**(6): p. 1783-1801.
- 458 2. Powder, K.E. and R.C. Albertson, Cichlid fishes as a model to understand normal  
459 and clinical craniofacial variation. *Dev Biol*, 2016. **415**(2): p. 338-346.
- 460 3. McGirr, J. and C. Martin, Few Fixed Variants between Trophic Specialist Pupfish  
461 Species Reveal Candidate Cis-Regulatory Alleles Underlying Rapid Craniofacial  
462 Divergence. *Mol Biol Evol*, 2021. **38**(2): p. 405-423.
- 463 4. Brugmann, S.A., et al., Comparative gene expression analysis of avian embryonic  
464 facial structures reveals new candidates for human craniofacial disorders. *Hum*  
465 *Mol Genet*, 2010. **19**(5): p. 920-30.
- 466 5. Grant, P.R. and B.R. Grant, Unpredictable evolution in a 30-year study of Darwin's  
467 finches. *Science*, 2002. **296**(5568): p. 707-11.
- 468 6. Navalon, G., et al., The consequences of craniofacial integration for the adaptive  
469 radiations of Darwin's finches and Hawaiian honeycreepers. *Nat Ecol Evol*, 2020.  
470 **4**(2): p. 270-278.
- 471 7. Stayton, C.T., Morphological evolution of the lizard skull: a geometric  
472 morphometrics survey. *J Morphol*, 2005. **263**(1): p. 47-59.

- 473 8. Sanger, T., et al., ROLES FOR MODULARITY AND CONSTRAINT IN THE  
474 EVOLUTION OF CRANIAL DIVERSITY AMONG ANOLIS LIZARDS. *Evolution*,  
475 2011. **66**(5): p. 1525-1542.
- 476 9. Cardini, A. and P. Polly, Larger mammals have longer faces because of size-  
477 related constraints on skull form. *Nat Commun*, 2013. **4**: p. 2458.
- 478 10. Porto, A., et al., Size variation, growth strategies, and the evolution of modularity  
479 in the mammalian skull. *Evolution*, 2013. **67**(11): p. 3305-22.
- 480 11. Schoenebeck, J.J. and E.A. Ostrander, The genetics of canine skull shape  
481 variation. *Genetics*, 2013. **193**(2): p. 317-25.
- 482 12. Sears, K., Differences in Growth Generate the Diverse Palate Shapes of New  
483 World Leaf-Nosed Bats (Order Chiroptera, Family Phyllostomidae). *Evol Biol*,  
484 2014. **41**: p. 12-21.
- 485 13. Arbour, J.H., A.A. Curtis, and S.E. Santana, Signatures of echolocation and dietary  
486 ecology in the adaptive evolution of skull shape in bats. *Nat Commun*, 2019. **10**(1):  
487 p. 2036.
- 488 14. Arnold, S., Morphology, Performance and Fitness. *Amer Zool*, 1983. **23**: p. 347-  
489 361.
- 490 15. Hallgrímsson, B., et al., Deciphering the Palimpsest: Studying the Relationship  
491 Between Morphological Integration and Phenotypic Covariation. *Evol Biol*, 2009.  
492 **36**(4): p. 355-376.
- 493 16. Hallgrímsson, B., et al., Let's Face It-Complex Traits Are Just Not That Simple.  
494 *PLoS genetics*, 2014. **10**(11): p. e1004724.
- 495 17. Hochheiser, H., et al., The FaceBase Consortium: a comprehensive program to  
496 facilitate craniofacial research. *Developmental biology*, 2011. **355**(2): p. 175-82.
- 497 18. Fish, J.L., et al., Multiple developmental mechanisms regulate species-specific jaw  
498 size. *Development*, 2014. **141**(3): p. 674-84.
- 499 19. Glazier, A.M., J.H. Nadeau, and T.J. Aitman, Finding genes that underlie complex  
500 traits. *Science*, 2002. **298**(5602): p. 2345-9.
- 501 20. Hirschhorn, J.N. and M.J. Daly, Genome-wide association studies for common  
502 diseases and complex traits. *Nat Rev Genet*, 2005. **6**(2): p. 95-108.
- 503 21. Turner, G.F., et al., How many species of cichlid fishes are there in African lakes?  
504 *Mol Ecol*, 2008. **10**(3): p. 793-806.
- 505 22. Salzburger, W. and A. Meyer, The species flocks of East African cichlid fishes:  
506 recent advances in molecular phylogenetics and population genetics.  
507 *Naturwissenschaften*, 2004. **91**(6): p. 277-90.
- 508 23. Konings, A., *Malawi cichlids in their natural habitat*. 5th ed. 2016: Cichlid Press.
- 509 24. Liem, K., Adaptive Significance of Intra- and Interspecific Differences in the  
510 Feeding Repertoires of Cichlid Fishes. *Amer Zool*, 1980. **20**(1): p. 295-314.
- 511 25. Cooper, W.J., et al., Benthic-pelagic divergence of cichlid feeding architecture was  
512 prodigious and consistent during multiple adaptive radiations within African rift-  
513 lakes. *PLoS One*, 2010. **5**(3): p. e9551.
- 514 26. Wainwright, P., et al., Suction feeding mechanics, performance, and diversity in  
515 fishes. *Integr Comp Biol*, 2007. **47**(1): p. 96-106.
- 516 27. Wainwright, P. and S.W. Day, The forces exerted by aquatic suction feeders on  
517 their prey. *J R Soc Interface*, 2007. **4**(14): p. 553-560.

- 518 28. Westneat, M., *Skull Biomechanics and Suction Feeding in Fishes*. Fish  
519 Biomechanics. Fish Physiology, ed. R. Shadwick and G. Lauder. 2005, San Diego:  
520 Academic. 29-75.
- 521 29. Ferry-Graham, L.A. and G.V. Lauder, Aquatic prey capture in ray-finned fishes: a  
522 century of progress and new directions. *J Morphol*, 2001. **248**(2): p. 99-119.
- 523 30. Westneat, M.W., Evolution of levers and linkages in the feeding mechanisms of  
524 fishes. *Integr Comp Biol*, 2004. **44**(5): p. 378-89.
- 525 31. Westneat, M.W., A biomechanical model for analysis of muscle force, power output  
526 and lower jaw motion in fishes. *J Theor Biol*, 2003. **223**(3): p. 269-81.
- 527 32. Albertson, R.C., et al., Integration and evolution of the cichlid mandible: the  
528 molecular basis of alternate feeding strategies. *Proc Natl Acad Sci U S A*, 2005.  
529 **102**(45): p. 16287-92.
- 530 33. Carroll, A.M., et al., Morphology predicts suction feeding performance in  
531 centrarchid fishes. *J Exp Biol*, 2004. **207**(Pt 22): p. 3873-81.
- 532 34. Meer, H., J. van Der, and G. Anker, Retinal resolving power and sensitivity of the  
533 photopic system in seven haplochromine species (Pisces, Teleostei). *Neth J Zool*,  
534 1984. **34**: p. 197-209.
- 535 35. Hulsey, C.D., M.C. Mims, and J.T. Streebman, Do constructional constraints  
536 influence cichlid craniofacial diversification? *Proc R Soc B*, 2007. **274**: p. 1867-  
537 1875.
- 538 36. Albertson, R.C., et al., Phylogeny of a rapidly evolving clade: the cichlid fishes of  
539 Lake Malawi, East Africa. *Proc Natl Acad Sci U S A*, 1999. **96**(9): p. 5107-10.
- 540 37. Young, K.A., J. Snoeks, and O. Seehausen, Morphological diversity and the roles  
541 of contingency, chance and determinism in african cichlid radiations. *PLoS One*,  
542 2009. **4**(3): p. e4740.
- 543 38. Cooper, W.J. and M.W. Westneat, Form and function of damselfish skulls: rapid  
544 and repeated evolution into a limited number of trophic niches. *BMC Evol Biol*,  
545 2009. **9**: p. 24.
- 546 39. Westneat, M.W., et al., Local phylogenetic divergence and global evolutionary  
547 convergence of skull function in reef fishes of the family Labridae. *Proc Biol Sci*,  
548 2005. **272**(1567): p. 993-1000.
- 549 40. Collar, D.C. and P.C. Wainwright, *Ecomorphology of the Centrarchidae*, in  
550 *Centrarchid fishes: diversity, biology and conservation*, S. Cook and D. Phillipp,  
551 Editors. 2009, Blackwell Scientific: Cambridge. p. 70-89.
- 552 41. Arnold, S.J., Constraints on phenotypic evolution. *Am Nat*, 1992. **140 Suppl 1**: p.  
553 S85-107.
- 554 42. Futuyma, D.J., Evolutionary constraint and ecological consequences. *Evolution*,  
555 2010. **64**(7): p. 1865-84.
- 556 43. Maynard Smith, J., et al., Developmental Constraints and Evolution: A Perspective  
557 from the Mountain Lake Conference on Development and Evolution. *Quarterly*  
558 *Review of Biology*, 1985. **60**(3): p. 265-287.
- 559 44. Thompson, M. and C. Jiggins, Supergenes and their role in evolution. *Heredity*,  
560 2014. **113**: p. 1-8.
- 561 45. Saenko, S.V., et al., Unravelling the genes forming the wing pattern supergene in  
562 the polymorphic butterfly *Heliconius numata*. *Evodevo*, 2019. **10**: p. 16.

- 563 46. Reid, K., M.A. Bell, and K.R. Veeramah, Threespine Stickleback: A Model System  
564 For Evolutionary Genomics. *Annu Rev Genomics Hum Genet*, 2021. **22**: p. 357-  
565 383.
- 566 47. Fabre, A.C., et al., Functional constraints during development limit jaw shape  
567 evolution in marsupials. *Proc Biol Sci*, 2021. **288**(1949): p. 20210319.
- 568 48. *tpsDig2*. <http://life.bio.sunysb.edu/morph/soft-tps.html>.
- 569 49. Burford Reiskind, M.O., et al., Development of a universal double-digest RAD  
570 sequencing approach for a group of non-model, ecologically and economically  
571 important insect and fish taxa. *Molecular Ecology Resources*, 2016.
- 572 50. Broman, K.W., *A guide to QTL mapping with R/qtl*. 2009, New York, NY: Springer.
- 573 51. Arends, D., et al., R/qtl: high-throughput multiple QTL mapping. *Bioinformatics*,  
574 2010. **26**(23): p. 2990-2.
- 575 52. Broman, K.W., et al., R/qtl: QTL mapping in experimental crosses. *Bioinformatics*,  
576 2003. **19**(7): p. 889-90.
- 577 53. Jansen, R.C., Controlling the type I and type II errors in mapping quantitative trait  
578 loci. *Genetics*, 1994. **138**(3): p. 871-81.
- 579 54. Powder, K.E., *QTL analysis in fishes*, in *eQTL Analysis*, X.M. Shi, Editor. 2020,  
580 Springer.
- 581 55. Huang, D.W., B.T. Sherman, and R.A. Lempicki, Systematic and integrative  
582 analysis of large gene lists using DAVID bioinformatics resources. *Nat Protoc*,  
583 2009. **4**(1): p. 44-57.
- 584 56. Huang, D.W., B.T. Sherman, and R.A. Lempicki, Bioinformatics enrichment tools:  
585 paths toward the comprehensive functional analysis of large gene lists. *Nucleic  
586 Acids Res*, 2009. **37**(1): p. 1-13.
- 587 57. Cooper, W.J., et al., Functional and Genetic Integration in the Skulls of Lake  
588 Malawi Cichlids. *Evol Biol*, 2011. **38**(3): p. 316-334.
- 589 58. Holzman, R., et al., Jaw protrusion enhances forces exerted on prey by suction  
590 feeding fishes. *J R Soc Interface*, 2008. **5**(29): p. 1445-57.
- 591 59. van Wassenbergh, S. and P. Aerts, Aquatic suction feeding dynamics: insights  
592 from computational modelling. *J R Soc Interface*, 2009. **6**(31): p. 149-158.
- 593 60. Moran, P. and I. Kornfield, Retention of ancestral polymorphism in the Mbuna  
594 species flock of Lake Malawi. *Mol Biol Evol*, 1993. **10**: p. 1015-1029.
- 595 61. Smith, P.F., A. Konings, and I. Kornfield, Hybrid origin of a cichlid population in  
596 Lake Malawi: implications for genetic variation and species diversity. *Mol Ecol*,  
597 2003. **12**(9): p. 2497-504.
- 598 62. Nagl, S., et al., Persistence of neutral polymorphisms in Lake Victoria cichlid fish.  
599 *Proc Natl Acad Sci U S A*, 1998. **95**(24): p. 14238-43.
- 600 63. Loh, Y.H., et al., Comparative analysis reveals signatures of differentiation amid  
601 genomic polymorphism in Lake Malawi cichlids. *Genome Biol*, 2008. **9**(7): p. R113.
- 602 64. Malinsky, M., et al., Whole-genome sequences of Malawi cichlids reveal multiple  
603 radiations interconnected by gene flow. *Nat Ecol Evol*, 2018. **2**(12): p. 1940-1955.
- 604 65. Pigliucci, M. and G.B. Muller, *Evolution, the Extended Synthesis*. 2010,  
605 Cambridge, MA: MIT Press.
- 606 66. Melo, D., et al., Modularity: genes, development and evolution. *Annu Rev Ecol  
607 Evol Syst*, 2016. **47**: p. 463-486.

- 608 67. Wagner, G.P., M. Pavlicev, and J.M. Cheverud, The road to modularity. *Nat Rev*  
609 *Genet*, 2007. **8**(12): p. 921-31.
- 610 68. Hendrikse, J., T. Parsons, and B. Hallgrímsson, Evolvability as the proper focus of  
611 evolutionary developmental biology. *Evol Dev*, 2007. **9**: p. 393-401.
- 612 69. Fish, J.L., Evolvability of the vertebrate craniofacial skeleton. *Semin Cell Dev Biol*,  
613 2019. **91**: p. 13-22.
- 614 70. Breuker, C.J., V. Debat, and C.P. Klingenberg, Functional evo-devo. *Trends Ecol*  
615 *Evol*, 2006. **21**(9): p. 488-92.
- 616 71. Klingenberg, C.P., Evolution and development of shape: integrating quantitative  
617 approaches. *Nat Rev Genet*, 2010. **11**(9): p. 623-35.
- 618 72. Holzman, R., et al., Biomechanical trade-offs bias rates of evolution in the feeding  
619 apparatus of fishes. *Proc Biol Sci*, 2012. **279**(1732): p. 1287-92.
- 620 73. Parsons, K.J., et al., Wnt signalling underlies the evolution of new phenotypes and  
621 craniofacial variability in Lake Malawi cichlids. *Nat Commun*, 2014. **5**: p. 3629.
- 622 74. Powder, K.E., et al., Constraint and diversification of developmental trajectories in  
623 cichlid facial morphologies. *Evodevo*, 2015. **6**: p. 25.
- 624 75. Liu, B., S.M. Rooker, and J.A. Helms, Molecular control of facial morphology.  
625 *Semin Cell Dev Biol*, 2010. **21**(3): p. 309-13.
- 626 76. Brugmann, S.A., et al., Wnt signaling mediates regional specification in the  
627 vertebrate face. *Development*, 2007. **134**(18): p. 3283-95.
- 628 77. Alexander, C., et al., Wnt signaling interacts with bmp and edn1 to regulate dorsal-  
629 ventral patterning and growth of the craniofacial skeleton. *PLoS Genet*, 2014.  
630 **10**(7): p. e1004479.
- 631 78. Long, F., Building strong bones: molecular regulation of the osteoblast lineage. *Nat*  
632 *Rev Mol Cell Biol*, 2011. **13**(1): p. 27-38.
- 633 79. Zhong, Z., N.J. Ethen, and B.O. Williams, WNT signaling in bone development and  
634 homeostasis. *Wiley Interdiscip Rev Dev Biol*, 2014. **3**(6): p. 489-500.
- 635 80. Urrego, D., et al., Potassium channels in cell cycle and cell proliferation. *Philos*  
636 *Trans R Soc Lond B Biol Sci*, 2014. **369**(1638): p. 20130094.
- 637 81. Pini, J., et al., Osteogenic and Chondrogenic Master Genes Expression Is  
638 Dependent on the Kir2.1 Potassium Channel Through the Bone Morphogenetic  
639 Protein Pathway. *J Bone Miner Res*, 2018. **33**(10): p. 1826-1841.
- 640 82. Grossinger, E.M., et al., Ca(2+)-Dependent Regulation of NFATc1 via KCa3.1 in  
641 Inflammatory Osteoclastogenesis. *J Immunol*, 2018. **200**(2): p. 749-757.
- 642 83. Yang, J.E., et al., The Role of KV7.3 in Regulating Osteoblast Maturation and  
643 Mineralization. *Int J Mol Sci*, 2016. **17**(3): p. 407.
- 644 84. George, L.F., T. Isner, and E.A. Bates, Ion Channels in Bone Morphogenetic  
645 Protein Signaling. *Bioelectricity*, 2019. **1**(1): p. 46-48.
- 646 85. Tristani-Firouzi, M. and S.P. Etheridge, Kir 2.1 channelopathies: the Andersen-  
647 Tawil syndrome. *Pflugers Arch*, 2010. **460**(2): p. 289-94.
- 648 86. Hamilton, M.J. and M. Suri, "Electrifying dysmorphology": Potassium  
649 channelopathies causing dysmorphic syndromes. *Adv Genet*, 2020. **105**: p. 137-  
650 174.
- 651 87. Adams, D.S., et al., Bioelectric signalling via potassium channels: a mechanism  
652 for craniofacial dysmorphogenesis in KCNJ2-associated Andersen-Tawil  
653 Syndrome. *J Physiol*, 2016. **594**(12): p. 3245-70.



- 654 88. Graham, J.M., Jr., et al., KCNK9 imprinting syndrome-further delineation of a  
655 possible treatable disorder. *Am J Med Genet A*, 2016. **170**(10): p. 2632-7.
- 656 89. Saint-Jeannet, J.P. and S.A. Moody, Establishing the pre-placodal region and  
657 breaking it into placodes with distinct identities. *Dev Biol*, 2014. **389**(1): p. 13-27.
- 658 90. Lleras-Forero, L. and A. Streit, Development of the sensory nervous system in the  
659 vertebrate head: the importance of being on time. *Curr Opin Genet Dev*, 2012.  
660 **22**(4): p. 315-22.
- 661 91. Atta, K., Morphological, anatomical and histological studies on the olfactory organs  
662 and eyes of teleost fish: *Anguilla anguilla* in relation to its feeding habits. *J Basic &*  
663 *App Zool*, 2013. **66**(3): p. 101-108.
- 664 92. Kasumyan, A., The olfactory system in fish: structure, function, and role in  
665 behavior. *J Ichthy*, 2004. **44**(2): p. S180.  
666  
667

668 FIGURES WITH LEGENDS

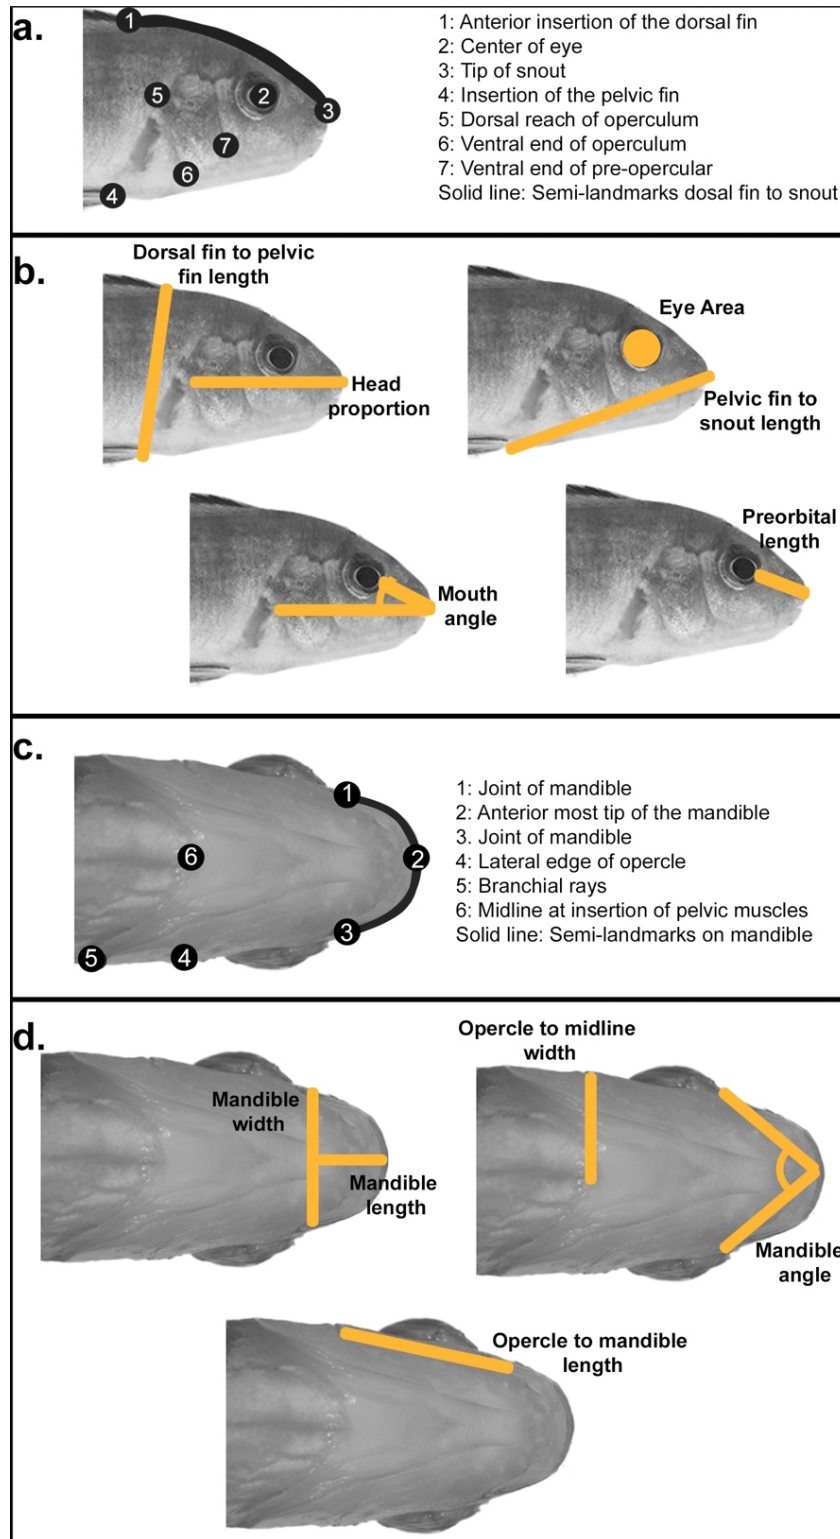

669  
670  
671  
672

**Figure 1. Measures used to assess lateral and ventral head shape. (a,c)** Geometric and **(b, d)** linear measures were used to assess head shape changes with functional implications for feeding biomechanics.

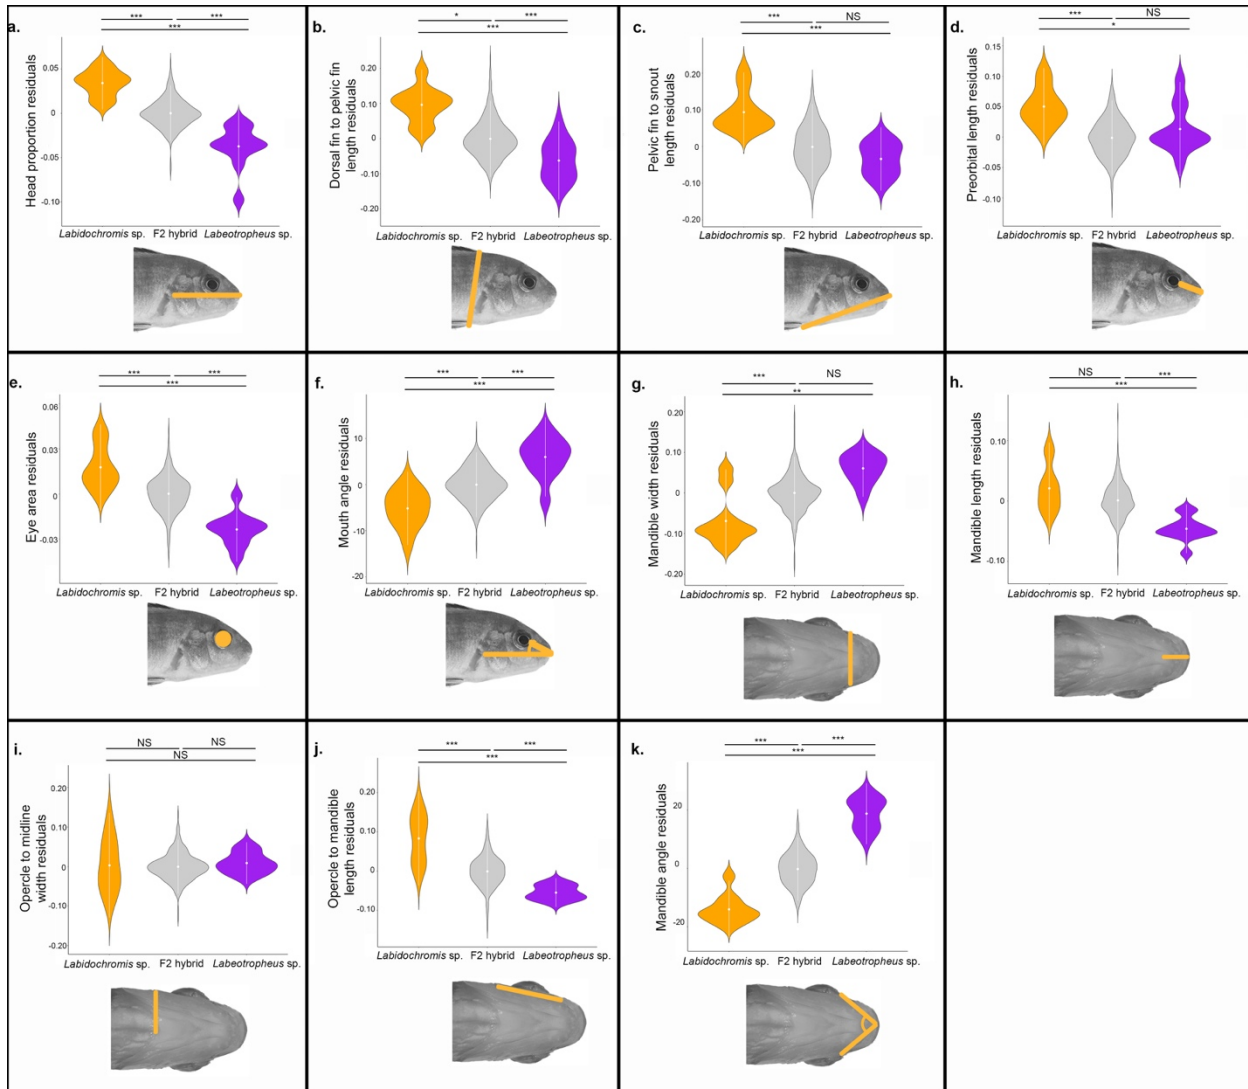

673  
674  
675  
676  
677  
678  
679  
680  
681  
682  
683  
684  
685  
686  
687

**Figure 2. Phenotypic differences among *Labidochromis* sp., *Labeotropheus* sp., and their F2 hybrids.** Phenotypes measured are indicated by illustration and include (a) head proportion, measured as head length/standard length, (b) dorsal to pelvic fin length, (c) snout to pelvic fin length, (d) length of the preorbital region of the head, (e) eye area, (f) mouth angle, (g) mandible width, (h) mandible length, (i) opercle to midline width, (j) length from the opercle to the mandible, and (k) angle formed from posterior ends of the mandible to the midline. Significance in violin plots is based on ANOVA analysis followed by Tukeys HSD (data in Table S1; p-values indicated by \* <0.05, \*\* <0.01, \*\*\* <0.005, NS >0.05).

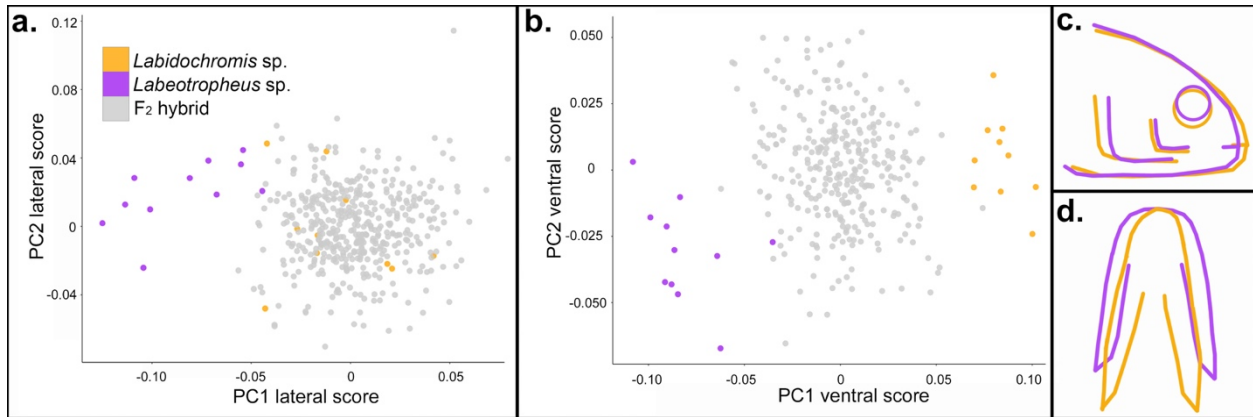

688  
689  
690  
691  
692  
693  
694  
695  
696

**Figure 3. Geometric morphometric phenotypes among parentals and hybrids.**

Multivariate analysis of shape quantifies differences in overall morphology in the (a, c) lateral and (b, d) ventral anatomy. Shapes described by each principal component are described in the text and visualized in Figure S1. Average shape (c, d) of *Labidochromis* sp. (orange) and *Labeotropheus* sp. (purple) based on (a,b) highlights phenotypic variation between alternate feeding strategies.

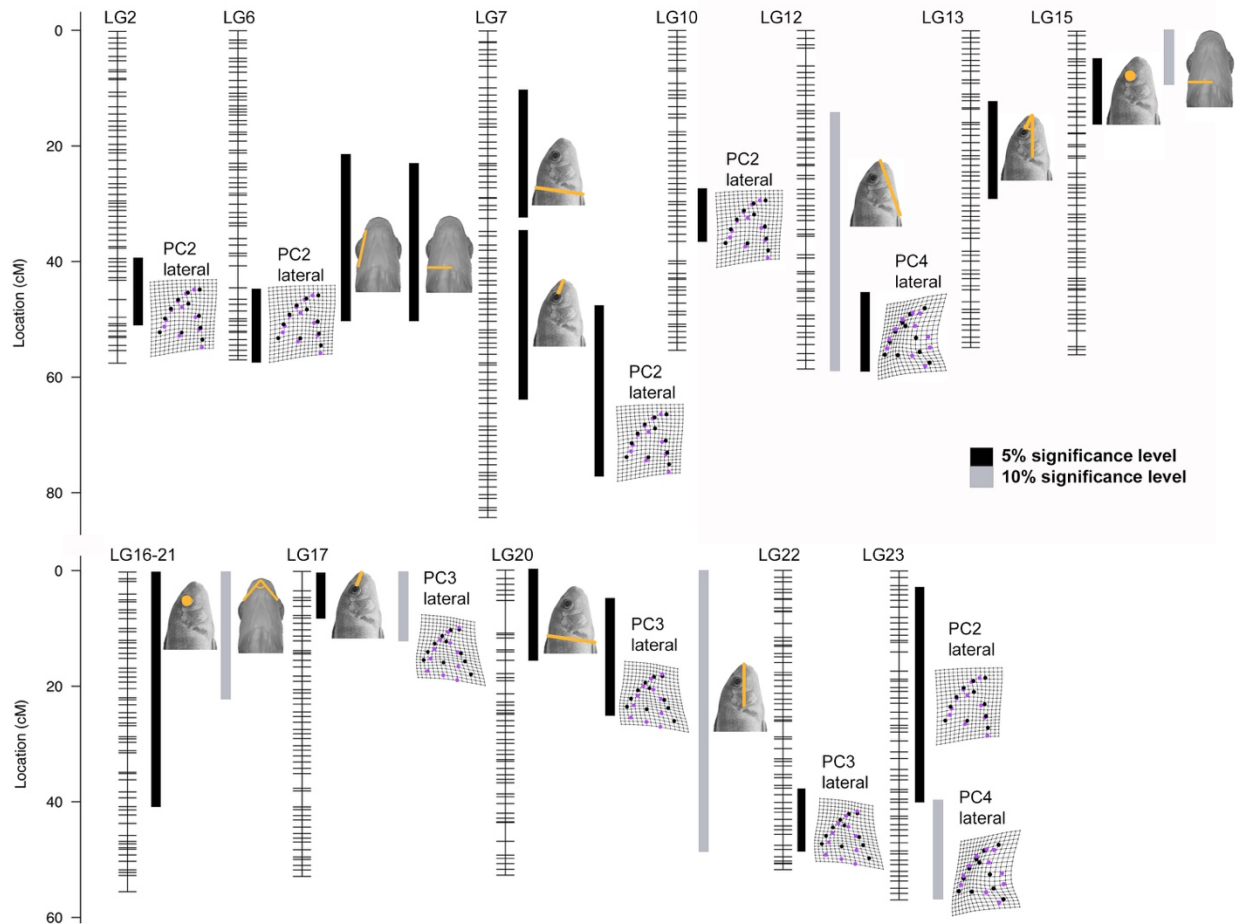

697  
698

699 **Figure 4. Quantitative trait loci (QTL) mapping identifies 23 intervals associated**  
700 **with head shape variation in hybrids of *Labidochromis* and *Labeotropheus*.** Each  
701 linkage group (LG, i.e. chromosome) is indicated with genetic markers noted by hash  
702 marks. The phenotype related to each QTL region is indicated by illustrations. Black  
703 bars are significant at the 5% genome-wide level, while gray bars are suggestive,  
704 meeting the 10% genome-wide level. Bar widths indicate 95% confidence interval for  
705 the QTL, as calculated by Bayes analysis. QTL scans at the genome and linkage group  
706 level are in Figures S2 and S3. Details of the QTL scan including markers and physical  
707 locations defining each region are in Table S3.
